# Supplementary material
Source: PubMed Central journal article supplement (PMC6911034)
Supplement: NIHMS1531949-supplement-240_2019_1144_MOESM1_ESM.pdf [file NIHMS1531949-supplement-240_2019_1144_MOESM1_ESM.pdf]

**Supplemental Table 1.** The patterns of oxalate fluxes and electrical parameters across isolated, short-circuited segments of cecum from non-colonized WT wild type C57BL/6, single knockout (KO), and double knockout (dKO) all fed a diet supplemented with 1.5% oxalate.

| Group           | $J_{ms}$           | $J_{sm}$           | $\Delta J_{net}$   | $I_{sc}$          | $G_T$              |
|-----------------|--------------------|--------------------|--------------------|-------------------|--------------------|
| WT              | 49.3 ± 12.5<br>n=7 | 41.5 ± 12.5<br>n=7 | 7.8 ± 1.2<br>n=7   | 2.2 ± 0.3<br>n=7  | 18.7 ± 2.5<br>n=7  |
| AGT KO          | 29.1 ± 5.7<br>n=10 | 19.6 ± 2.6<br>n=10 | 9.5 ± 2.8<br>n=10  | 1.0 ± 0.3<br>n=10 | 17.5 ± 1.0<br>n=10 |
| PAT1/AGT<br>dKO | 11.0 ± 2.6<br>n=10 | 18.1 ± 2.2<br>n=10 | -7.1 ± 1.1<br>n=10 | 1.4 ± 0.2<br>n=10 | 13.7 ± 0.7<br>n=10 |
| DRA/AGT<br>dKO  | 27.4 ± 7.0<br>n=7  | 23.6 ± 6.2<br>n=7  | 3.7 ± 4.3<br>n=7   | 5.5 ± 0.4<br>n=7  | 19.0 ± 1.1<br>n=7  |

Oxalate fluxes are given in pmol/cm<sup>2</sup>/h, transepithelial conductance ( $G_T$ ) is given in mS/cm<sup>2</sup> and short-circuit current ( $I_{sc}$ ) is given in  $\mu$ Eq/cm<sup>2</sup>. (n) = the number of tissue pairs in each series.

**Supplemental Table 2.** The patterns of oxalate fluxes and electrical parameters across isolated, short-circuited segments of distal colon from non-colonized WT wild type C57BL/6, single knockout (KO), and double knockout (dKO) all fed a diet supplemented with 1.5% oxalate.

| Group           | $J_{ms}$           | $J_{sm}$           | $\Delta J_{net}$   | $I_{sc}$          | $G_T$              |
|-----------------|--------------------|--------------------|--------------------|-------------------|--------------------|
| WT              | 30.8 ± 4.6<br>n=7  | 34.9 ± 3.9<br>n=7  | -4.2 ± 1.6<br>n=7  | 1.5 ± 0.2<br>n=7  | 15.5 ± 1.7<br>n=7  |
| AGT KO          | 20.8 ± 1.9<br>n=10 | 27.2 ± 2.0<br>n=10 | -6.5 ± 0.6<br>n=10 | 2.2 ± 0.3<br>n=10 | 15.9 ± 0.6<br>n=10 |
| PAT1/AGT<br>dKO | 12.4 ± 1.4<br>n=8  | 26.7 ± 2.4<br>n=8  | -13.1 ± 1.6<br>n=8 | 1.7 ± 0.2<br>n=8  | 11.6 ± 0.5<br>n=8  |

|             |                   |                   |                    |                  |                   |
|-------------|-------------------|-------------------|--------------------|------------------|-------------------|
| DRA/AGT dKO | 26.8 ± 3.2<br>n=7 | 43.6 ± 3.6<br>n=7 | -16.9 ± 1.4<br>n=7 | 3.0 ± 0.4<br>n=7 | 17.7 ± 1.4<br>n=7 |
|-------------|-------------------|-------------------|--------------------|------------------|-------------------|

Oxalate fluxes are given in pmol/cm<sup>2</sup>/h, transepithelial conductance (G<sub>T</sub>) is given in mS/cm<sup>2</sup> and short-circuit current (I<sub>sc</sub>) is given in μEq/cm<sup>2</sup>. (n) = the number of tissue pairs in each series.

**Supplemental Table 3.** Oxalate excretion, μmoles/24 h in urine of the four mouse genotypes included in this study before and after artificial colonization with OXWR.

| Group       | PAT 1 KO          | DRA KO              | PAT1/AGT dKO       | DRA/AGT dKO        |
|-------------|-------------------|---------------------|--------------------|--------------------|
| Baseline    | 3.6 ± 0.6<br>n=9  | 0.8 ± 0.2<br>n=7    | 4.8 ± 0.2<br>n=7   | 1.44 ± 0.2<br>n=11 |
| Post gavage | 0.5 ± 0.1*<br>N=9 | 0.5 ± 0.03*<br>n=16 | 0.4 ± 0.1*<br>n=10 | 1.64 ± 0.2<br>n=11 |

Values are the means ± SE for the mean of duplicate determinations on each 24 h urine collection. Baseline values reflect oxalate excretion when mice are fed the oxalate-supplemented diet (1.5% Ox – 0.5% Ca<sup>2+</sup>). Post gavage urine collections were conducted between 12-15 days after the gavage procedure during which time all mice were still being fed the oxalate-supplemented diet. These values are also included in the text of the results as appropriate for correlation purposes with the changes observed in transmural oxalate fluxes.

\*Significantly different from baseline (P < 0.05). Note that the DRA/AGT dKO group were not colonized at the time the post-gavage 24 h urine was collected whereas all other animals were confirmed colonized.
